# Supplementary material for: Transcriptome, Methylome and Genomic Variations Analysis of Ectopic Thyroid Glands
Source: PubMed Central journal article supplement (PMC2955549; doi:10.1371/journal.pone.0013420), 2010-10-15

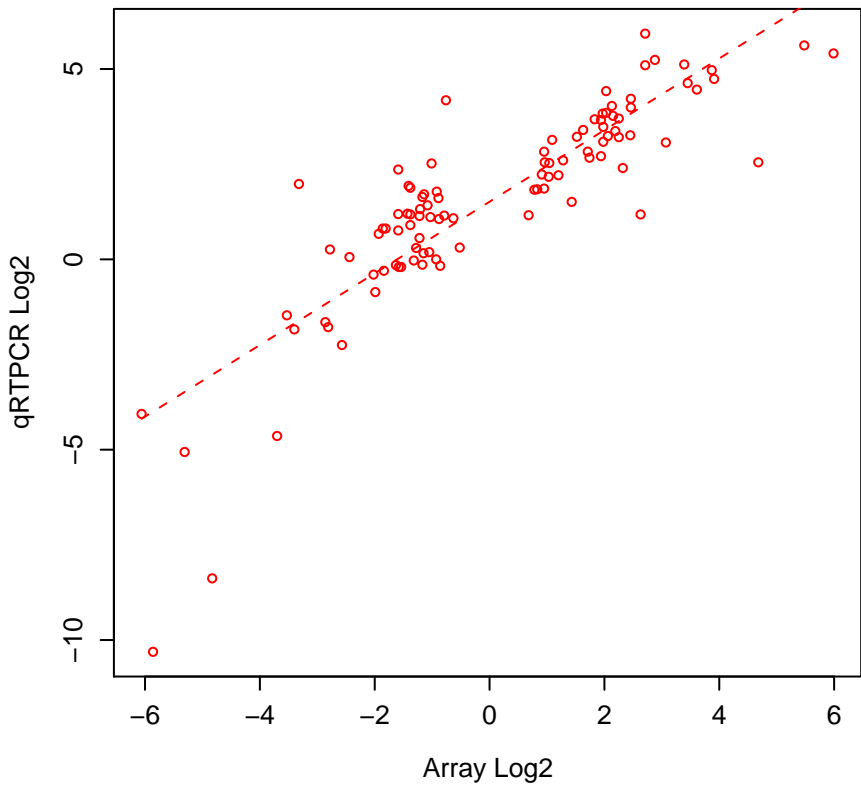

Supplement: pone.0013420.s001.pdf [file pone.0013420.s001.pdf]
