# Supplementary material for: Transcriptome, Methylome and Genomic Variations Analysis of Ectopic Thyroid Glands
Source: PubMed Central journal article supplement (PMC2955549; doi:10.1371/journal.pone.0013420), 2010-10-15
Supplement: pone.0013420.s003.pdf [file pone.0013420.s003.pdf]

| <b>induced genes</b>      |                                                  |      |            |               |
|---------------------------|--------------------------------------------------|------|------------|---------------|
| Functional Group 1        | Enrichment score (a): 10.44                      |      |            |               |
| Category                  | Term                                             | Hits | PValue (b) | Benjamini (c) |
| GOTERM_BP_ALL             | GO:0048856--anatomical structure development     | 107  | 7.91 E-13  | 4.15 E-9      |
| GOTERM_BP_ALL             | GO:0048731--system development                   | 88   | 1.48 E-10  | 1.94 E-7      |
| GOTERM_BP_ALL             | GO:0007275--multicellular organismal development | 106  | 3.83 E-10  | 3.36 E-7      |
| <b>Functional Group 2</b> |                                                  |      |            |               |
| Functional Group 2        | Enrichment score: 7.06                           |      |            |               |
| Category                  | Term                                             | Hits | PValue     | Benjamini     |
| GOTERM_BP_ALL             | GO:0001568--blood vessel development             | 22   | 8.90 E-9   | 5.84 E-6      |
| GOTERM_BP_ALL             | GO:0001944--vasculature development              | 22   | 1.18 E-8   | 6.21 E-6      |
| GOTERM_BP_ALL             | GO:0048514--blood vessel morphogenesis           | 19   | 1.63 E-7   | 5.04 E-5      |
| GOTERM_BP_ALL             | GO:0048646--anatomical structure formation       | 19   | 5.08 E-7   | 1.48 E-4      |
| GOTERM_BP_ALL             | GO:0001525--angiogenesis                         | 17   | 5.21 E-7   | 1.44 E-4      |
| <b>Functional Group 3</b> |                                                  |      |            |               |
| Functional Group 3        | Enrichment score: 6.79                           |      |            |               |
| Category                  | Term                                             | Hits | PValue     | Benjamini     |
| SP_PIR_KEYWORDS           | extracellular matrix                             | 23   | 1.39 E-8   | 2.96 E-6      |
| GOTERM_CC_ALL             | GO:0005578--proteinaceous extracellular matrix   | 27   | 4.61 E-7   | 1.33 E-4      |
| GOTERM_CC_ALL             | GO:0031012--extracellular matrix                 | 27   | 6.44 E-7   | 1.39 E-4      |
| <b>Functional Group 4</b> |                                                  |      |            |               |
| Functional Group 4        | Enrichment score: 5.84                           |      |            |               |
| Category                  | Term                                             | Hits | PValue     | Benjamini     |
| GOTERM_BP_ALL             | GO:0048534--hemopoietic or lymphoid organ        | 20   | 9.35 E-7   | 2.45 E-4      |
| GOTERM_BP_ALL             | GO:0030097--hemopoiesis                          | 19   | 1.42 E-6   | 3.41 E-4      |
| GOTERM_BP_ALL             | GO:0002520--immune system development            | 20   | 2.19 E-6   | 5.01 E-4      |
| <b>Functional Group 5</b> |                                                  |      |            |               |
| Functional Group 5        | Enrichment score: 5.76                           |      |            |               |
| Category                  | Term                                             | Hits | PValue     | Benjamini     |
| SP_PIR_KEYWORDS           | triple helix                                     | 11   | 2.84 E-9   | 1.01 E-6      |
| SP_PIR_KEYWORDS           | hydroxylysine                                    | 10   | 6.70 E-8   | 8.92 E-6      |
| SP_PIR_KEYWORDS           | hydroxyproline                                   | 10   | 1.15 E-7   | 1.36 E-5      |
| INTERPRO                  | IPR008160:Collagen triple helix repeat           | 13   | 4.68 E-7   | 0.0027        |
| INTERPRO                  | IPR008161:Collagen helix repeat                  | 11   | 6.05 E-7   | 0.0017        |
| SP_PIR_KEYWORDS           | hydroxylation                                    | 11   | 2.08 E-6   | 1.71 E-4      |
| GOTERM_BP_ALL             | GO:0006817--phosphate transport                  | 13   | 3.49 E-6   | 6.54 E-4      |
| SP_PIR_KEYWORDS           | collagen                                         | 12   | 5.54 E-5   | 0.0036        |
| GOTERM_BP_ALL             | GO:0015698--inorganic anion transport            | 14   | 2.02 E-4   | 0.0276        |
| GOTERM_BP_ALL             | GO:0006820--anion transport                      | 15   | 4.35 E-4   | 0.0570        |
| <b>repressed genes</b>    |                                                  |      |            |               |
| <b>Functional Group 1</b> |                                                  |      |            |               |
| Functional Group 1        | Enrichment score: 6.24                           |      |            |               |
| Category                  | Term                                             | Hits | PValue     | Benjamini     |
| SMART                     | SM00427:H2B                                      | 7    | 1.65 E-7   | 1.00 E-4      |
| INTERPRO                  | IPR000558:Histone H2B                            | 7    | 1.95 E-7   | 5.79 E-4      |
| PIR_SUPERFAMILY           | PIRSF002050:histone H2B                          | 7    | 4.72 E-7   | 0.001         |
| INTERPRO                  | IPR009072:Histone-fold                           | 9    | 6.66 E-6   | 0.013         |
| <b>Functional Group 2</b> |                                                  |      |            |               |
| Functional Group 2        | Enrichment score: 5.24                           |      |            |               |
| Category                  | Term                                             | Hits | PValue     | Benjamini     |
| GOTERM_BP_ALL             | GO:0006915--apoptosis                            | 40   | 1.30 E-6   | 7.60 E-4      |
| GOTERM_BP_ALL             | GO:0012501--programmed cell death                | 40   | 1.62 E-6   | 8.55 E-4      |
| GOTERM_BP_ALL             | GO:0016265--death                                | 41   | 2.34 E-6   | 9.47 E-4      |
| GOTERM_BP_ALL             | GO:0008219--cell death                           | 41   | 2.34 E-6   | 9.47 E-4      |
| GOTERM_BP_ALL             | GO:0048468--cell development                     | 46   | 5.35 E-4   | 0.086         |
| <b>Functional Group 3</b> |                                                  |      |            |               |
| Functional Group 3        | Enrichment score: 5.14                           |      |            |               |
| Category                  | Term                                             | Hits | PValue     | Benjamini     |
| INTERPRO                  | IPR007125:Histone core                           | 12   | 3.44 E-10  | 2.03 E-6      |
| SP_PIR_KEYWORDS           | Nucleosome core                                  | 12   | 1.38 E-9   | 7.38 E-7      |
| GOTERM_BP_ALL             | GO:0006334--nucleosome assembly                  | 13   | 5.01 E-7   | 4.39 E-4      |
| GOTERM_CC_ALL             | GO:0000786--nucleosome                           | 12   | 5.87 E-7   | 1.02 E-4      |
| GOTERM_BP_ALL             | GO:0031497--chromatin assembly                   | 13   | 2.21 E-6   | 0.0010        |
| INTERPRO                  | IPR009072:Histone-fold                           | 9    | 6.66 E-6   | 0.0130        |
| GOTERM_BP_ALL             | GO:0006333--chromatin assembly or disassembly    | 14   | 1.74 E-5   | 0.0057        |
| GOTERM_BP_ALL             | GO:0065004--protein-DNA complex assembly         | 14   | 3.30 E-5   | 0.0086        |
| SP_PIR_KEYWORDS           | Chromosomal protein                              | 12   | 7.27 E-5   | 0.0077        |
| GOTERM_CC_ALL             | GO:0000785--chromatin                            | 14   | 4.76 E-4   | 0.0194        |
| GOTERM_BP_ALL             | GO:0006323--DNA packaging                        | 18   | 7.10 E-4   | 0.0936        |
| GOTERM_BP_ALL             | GO:0006325--establishment and/or maintenance of  | 17   | 0.0015     | 0.1809        |
| GOTERM_BP_ALL             | GO:0051276--chromosome organization and          | 19   | 0.0026     | 0.2339        |
| <b>Functional Group 4</b> |                                                  |      |            |               |
| Functional Group 4        | Enrichment score: 4.51                           |      |            |               |
| Category                  | Term                                             | Hits | PValue     | Benjamini     |
| GOTERM_CC_ALL             | GO:0043229--intracellular organelle              | 228  | 1.09 E-5   | 0.0010        |
| GOTERM_CC_ALL             | GO:0043226--organelle                            | 228  | 1.14 E-5   | 9.91 E-4      |
| GOTERM_CC_ALL             | GO:0043231--intracellular membrane-bound         | 199  | 8.33 E-5   | 0.0055        |
| GOTERM_CC_ALL             | GO:0043227--membrane-bound organelle             | 199  | 8.58 E-5   | 0.0053        |
| <b>Functional Group 5</b> |                                                  |      |            |               |
| Functional Group 5        | Enrichment score: 4.33                           |      |            |               |
| Category                  | Term                                             | Hits | PValue     | Benjamini     |
| GOTERM_CC_ALL             | GO:0043292--contractile fiber                    | 10   | 2.36 E-5   | 0.0018        |
| GOTERM_CC_ALL             | GO:0030016--myofibril                            | 9    | 4.46 E-5   | 0.0032        |
| GOTERM_CC_ALL             | GO:0044449--contractile fiber part               | 9    | 9.17 E-5   | 0.0052        |

<sup>a</sup>Enrichment score is the negative log of geometric mean of each member's P-value in the cluster.

<sup>b</sup>P-value is calculated by Fisher's exact tests.

<sup>c</sup>Benjamini-Hochberg is the P-value corrected for multiple comparisons.
