# Supplementary material for: Transcriptome, Methylome and Genomic Variations Analysis of Ectopic Thyroid Glands
Source: PubMed Central journal article supplement (PMC2955549; doi:10.1371/journal.pone.0013420), 2010-10-15
Supplement: pone.0013420.s004.pdf [file pone.0013420.s004.pdf]

|                                                  | case 1            | case 2               | case 3               | control 1  | control 2  | control 3  | control AMBION |
|--------------------------------------------------|-------------------|----------------------|----------------------|------------|------------|------------|----------------|
| <b>thyroid gland location</b>                    | ectopic - lingual | ectopic - sublingual | ectopic - sublingual | orthotopic | orthotopic | orthotopic | orthotopic     |
| <b>age at diagnosis /<br/>sexe</b>               | 8.5 yr/F          | 2 d/F                | 2 d/F                | 4/M        | 15/F       | 16/F       | 68 / F         |
| <b>TSH (mU/L) prior to L-<br/>T4 treatment</b>   | 6.6               | N/A                  | N/A                  | N/A        | N/A        | N/A        | N/A            |
| <b>fT4 (pmol/L) prior to L-<br/>T4 treatment</b> | 8.5               | N/A                  | N/A                  | N/A        | N/A        | N/A        | N/A            |
| <b>LT4 daily dose (µg)</b>                       | 75                | 68.5                 | 50                   | N/A        | N/A        | N/A        | N/A            |
| <b>age at surgery (yr)</b>                       | 9.5               | 9                    | 14                   | 4          | 15         | 16         | 68             |
| <b>TSH (mU/L) prior to<br/>surgery</b>           | 0.08              | 3.9                  | 3.4                  | 0.08       | <0.03      | 0.01       | N/A            |
| <b>fT4 (pmol/L) prior to<br/>surgery</b>         | 15.7              | 14.0                 | 12.8                 | 24.8       | 22.07      | 17.3       | N/A            |
