# Supplementary material for: Transcriptome, Methylome and Genomic Variations Analysis of Ectopic Thyroid Glands
Source: PubMed Central journal article supplement (PMC2955549; doi:10.1371/journal.pone.0013420), 2010-10-15
Supplement: pone.0013420.s005.pdf [file pone.0013420.s005.pdf]

| Symbol   | Gene product                                                                                         | Enterz Gene | mean log2 ratio on HEEBO array (3 ectopic thyroids VS control AMBION) | RQ of qRTPCR vs normal thyroid (log2 converted) | RQ of qRTPCR vs hot nodules (log2 converted) | Taq Man Assay ID |
|----------|------------------------------------------------------------------------------------------------------|-------------|-----------------------------------------------------------------------|-------------------------------------------------|----------------------------------------------|------------------|
| CHGA     | chromogranin A (parathyroid secretory protein 1)                                                     | 1113        | -4,83                                                                 | -8,38                                           | 5,15                                         | Hs00900373_m1    |
| TNNC2    | troponin C2, fast                                                                                    | 7125        | -3,7                                                                  | -4,64                                           | 4,67                                         | Hs00268519_m1    |
| ACTA1    | actin, alpha 1, skeletal muscle                                                                      | 58          | -5,31                                                                 | -5,06                                           | 2,88                                         | Hs00559403_m1    |
| THRSP    | thyroid hormone responsive (SPOT14 homolog, rat)                                                     | 7069        | -1,01                                                                 | 2,52                                            | 1,97                                         | Hs00930058_m1    |
| GNG5     | guanine nucleotide binding protein (G protein), gamma 5                                              | 2787        | -1,22                                                                 | 0,56                                            | 1,75                                         | Hs00359134_g1    |
| SMOC2    | SPARC related modular calcium binding 2                                                              | 64094       | -1,32                                                                 | -0,03                                           | 1,49                                         | Hs00405777_m1    |
| TEF      | thyrotrophic embryonic factor                                                                        | 7008        | -1,17                                                                 | -0,13                                           | 1,21                                         | Hs00162657_m1    |
| CNTN6    | contactin 6                                                                                          | 27255       | -2,86                                                                 | -1,64                                           | 1,15                                         | Hs00274291_m1    |
| LRP8     | low density lipoprotein receptor-related protein 8, apolipoprotein e receptor                        | 7804        | -1,38                                                                 | 1,88                                            | 1,09                                         | Hs00182998_m1    |
| EDN3     | endothelin 3                                                                                         | 1908        | -3,4                                                                  | -1,84                                           | 0,99                                         | Hs00171177_m1    |
| FMR1     | fragile X mental retardation 1                                                                       | 2332        | -1,08                                                                 | 1,42                                            | 0,92                                         | Hs00924547_m1    |
| GJA1     | gap junction protein, alpha 1, 43kDa (connexin 43)                                                   | 2697        | -1,59                                                                 | 2,36                                            | 0,92                                         | Hs00748445_s1    |
| CKM      | creatine kinase, muscle                                                                              | 1158        | -5,86                                                                 | -10,31                                          | 0,74                                         | Hs00176490_m1    |
| SPRED1   | sprouty-related, EVH1 domain containing 1                                                            | 161742      | -1,05                                                                 | 0,19                                            | 0,71                                         | Hs00544790_m1    |
| CHORDC1  | cysteine and histidine-rich domain (CHORD)-containing, zinc binding protein 1                        | 26973       | -1,93                                                                 | 0,67                                            | 0,62                                         | Hs00854389_g1    |
| PLEKHA3  | pleckstrin homology domain containing, family A (phosphoinositide binding specific) member 3         | 65977       | -1,21                                                                 | 1,32                                            | 0,57                                         | Hs00604551_m1    |
| MTHFD2   | methylenetetrahydrofolate dehydrogenase (NADP+ dependent) 2, methenyltetrahydrofolate cyclohydrolase | 10797       | -1,86                                                                 | 0,81                                            | 0,48                                         | Hs00759197_s1    |
| SMAD9    | SMAD, mothers against DPP homolog 9 (Drosophila)                                                     | 4093        | -0,52                                                                 | 0,31                                            | 0,42                                         | Hs00195441_m1    |
| SMAD5    | SMAD, mothers against DPP homolog 5 (Drosophila)                                                     | 4090        | -0,79                                                                 | 1,15                                            | 0,42                                         | Hs00195437_m1    |
| TNFRSF21 | tumor necrosis factor receptor superfamily, member 21                                                | 27242       | 1,98                                                                  | 3,48                                            | 0,4                                          | Hs00205419_m1    |
| MUC1     | mucin 1, transmembrane                                                                               | 4582        | -1,63                                                                 | -0,1                                            | 0,39                                         | Hs00159357_m1    |
| PRKCE    | protein kinase C, epsilon                                                                            | 5581        | -3,32                                                                 | 1,98                                            | 0,38                                         | Hs00178455_m1    |
| EMP3     | epithelial membrane protein 3                                                                        | 2014        | 2,06                                                                  | 3,24                                            | 0,38                                         | Hs00171319_m1    |
| INHBB    | inhibin, beta B (activin AB beta polypeptide)                                                        | 3625        | -2,02                                                                 | -0,4                                            | 0,35                                         | Hs00173582_m1    |
| EVC2     | Ellis van Creveld syndrome 2 (limbin)                                                                | 132884      | -1,43                                                                 | 1,19                                            | 0,34                                         | Hs00377633_m1    |
| ARHGEF6  | Rac/Cdc42 guanine nucleotide exchange factor (GEF) 6                                                 | 9459        | 2,25                                                                  | 3,21                                            | 0,31                                         | Hs00374462_m1    |
| FOS      | v-fos FBJ murine osteosarcoma viral oncogene homolog                                                 | 2353        | 3,61                                                                  | 4,46                                            | 0,26                                         | Hs99999140_m1    |
| TSHR     | thyroid stimulating hormone receptor                                                                 | 7253        | 1,43                                                                  | 1,49                                            | 0,2                                          | Hs01053846_m1    |
| POLD4    | polymerase (DNA-directed), delta 4                                                                   | 57804       | 0,95                                                                  | 1,86                                            | 0,2                                          | Hs00221775_m1    |
| RASD1    | RAS, dexamethasone-induced 1                                                                         | 51655       | -3,53                                                                 | -1,47                                           | 0,12                                         | Hs00607394_g1    |
| EGFR     | epidermal growth factor receptor (erythroblastic leukemia viral (v-erb-b) oncogene homolog, avian)   | 1956        | -0,88                                                                 | 1,06                                            | 0,08                                         | Hs00193306_m1    |
| PKNOX1   | PBX/knotted 1 homeobox 1                                                                             | 5316        | -1,59                                                                 | 1,19                                            | 0,07                                         | Hs00231814_m1    |
| TCF4     | transcription factor 4                                                                               | 6925        | 0,78                                                                  | 1,83                                            | 0,04                                         | Hs00162613_m1    |
| NAV1     | neuron navigator 1                                                                                   | 89796       | 1,74                                                                  | 2,67                                            | 0,01                                         | Hs00368110_m1    |
| FZD4     | frizzled homolog 4 (Drosophila)                                                                      | 8322        | 0,91                                                                  | 2,23                                            | 0,01                                         | Hs00201853_m1    |
| PLXND1   | plexin D1                                                                                            | 23129       | 1,97                                                                  | 3,83                                            | 0                                            | Hs00391129_m1    |
| ACP2     | acid phosphatase 2, lysosomal                                                                        | 53          | 1,04                                                                  | 2,53                                            | 0                                            | Hs00155636_m1    |
| SFRS2    | splicing factor, arginine/serine-rich 2                                                              | 6427        | 2,03                                                                  | 4,42                                            | -0,01                                        | Hs00293258_m1    |
| DTX4     | deltex 4 homolog (Drosophila)                                                                        | 23220       | -1,84                                                                 | -0,3                                            | -0,02                                        | Hs00392288_m1    |
| CTNNA1   | catenin (cadherin-associated protein), alpha-like 1                                                  | 8727        | -1,59                                                                 | 0,76                                            | -0,03                                        | Hs00169384_m1    |
| PAX8     | paired box gene 8                                                                                    | 7849        | 4,68                                                                  | 2,55                                            | -0,04                                        | Hs00243335_m1    |
| CXCL12   | chemokine (C-X-C motif) ligand 12 (stromal cell-derived factor 1)                                    | 6387        | 1,94                                                                  | 2,71                                            | -0,04                                        | Hs00930455_m1    |
| SFRP1    | secreted frizzled-related protein 1                                                                  | 6422        | 2,88                                                                  | 5,24                                            | -0,07                                        | Hs00610060_m1    |
| TG       | thyroglobulin                                                                                        | 7038        | 1,2                                                                   | 2,21                                            | -0,07                                        | Hs00174974_m1    |
| EFNB2    | ephrin-B2                                                                                            | 1948        | 0,95                                                                  | 2,83                                            | -0,07                                        | Hs00187950_m1    |
| ROBO4    | roundabout homolog 4, magic roundabout (Drosophila)                                                  | 54538       | 1,63                                                                  | 3,4                                             | -0,1                                         | Hs00219408_m1    |
| ASPM     | asp (abnormal spindle)-like, microcephaly associated (Drosophila)                                    | 259266      | -0,76                                                                 | 4,18                                            | -0,12                                        | Hs00396967_m1    |
| FN1      | fibronectin 1                                                                                        | 2335        | 1,94                                                                  | 3,66                                            | -0,13                                        | Hs00415006_m1    |
| AKT3     | v-akt murine thymoma viral oncogene homolog 3 (protein kinase B, gamma)                              | 10000       | -1,14                                                                 | 1,71                                            | -0,13                                        | Hs00289302_s1    |
| CYBRD1   | cytochrome b reductase 1                                                                             | 79901       | -1,17                                                                 | 1,63                                            | -0,13                                        | Hs00227411_m1    |
| CXCR4    | chemokine (C-X-C motif) receptor 4                                                                   | 7852        | 0,68                                                                  | 1,16                                            | -0,15                                        | Hs00237052_m1    |
| FZD3     | frizzled homolog 3 (Drosophila)                                                                      | 7976        | -0,63                                                                 | 1,08                                            | -0,15                                        | Hs00184043_m1    |
| AKT1     | v-akt murine thymoma viral oncogene homolog 1                                                        | 207         | -0,89                                                                 | 1,8                                             | -0,18                                        | Hs00920503_m1    |
| LMO3     | LIM domain only 3 (rhombotin-like 2)                                                                 | 55885       | -1,15                                                                 | 0,16                                            | -0,18                                        | Hs00375237_m1    |
| NLK      | nemo like kinase                                                                                     | 51701       | 1,03                                                                  | 2,17                                            | -0,18                                        | Hs00212076_m1    |
| DKK3     | dickkopf homolog 3 (Xenopus laevis)                                                                  | 27122       | 2,15                                                                  | 3,77                                            | -0,2                                         | Hs00247429_m1    |
| LRP8     | low density lipoprotein receptor-related protein 8, apolipoprotein e receptor                        | 7804        | -1,38                                                                 | 0,9                                             | -0,2                                         | Hs00182998_m1    |
| CTGF     | connective tissue growth factor                                                                      | 1490        | 2,45                                                                  | 3,26                                            | -0,22                                        | Hs00170014_m1    |
| HSPA1B   | heat shock 70kDa protein 1B                                                                          | 3304        | -2,57                                                                 | -2,25                                           | -0,22                                        | Hs00359147_s1    |
| FGFR1    | fibroblast growth factor receptor 1 (fms-related tyrosine kinase 2, Pfeiffer syndrome)               | 2260        | 2,32                                                                  | 2,4                                             | -0,23                                        | Hs00241111_m1    |
| KPNA4    | karyopherin alpha 4 (importin alpha 3)                                                               | 3840        | -1,22                                                                 | 1,14                                            | -0,25                                        | Hs00927639_g1    |
| SNX1     | sorting nexin 1                                                                                      | 6642        | -1,38                                                                 | 1,17                                            | -0,25                                        | Hs00541723_m1    |
| VEGFA    | vascular endothelial growth factor                                                                   | 7422        | 3,07                                                                  | 3,07                                            | -0,27                                        | Hs00900055_m1    |
| FZD1     | frizzled homolog 1 (Drosophila)                                                                      | 8321        | -1,28                                                                 | 0,3                                             | -0,27                                        | Hs00268943_s1    |
| LAMA4    | laminin, alpha 4                                                                                     | 3910        | 2,13                                                                  | 4,03                                            | -0,29                                        | Hs00158588_m1    |
| CDC42EP4 | CDC42 effector protein (Rho GTPase binding) 4                                                        | 23580       | -1,54                                                                 | -0,2                                            | -0,29                                        | Hs00201664_m1    |
| CEBPB    | CCAAT/enhancer binding protein (C/EBP), beta                                                         | 1051        | -1,58                                                                 | -0,2                                            | -0,37                                        | Hs00270923_s1    |
| TPO      | thyroid peroxidase                                                                                   | 7173        | -0,93                                                                 | 0                                               | -0,43                                        | Hs00174927_m1    |
| DMD      | dystrophin (muscular dystrophy, Duchenne and Becker types)                                           | 1756        | -1,41                                                                 | 1,93                                            | -0,49                                        | Hs01049436_m1    |
| FXR1     | fragile X mental retardation, autosomal homolog 1                                                    | 8087        | -1,03                                                                 | 1,11                                            | -0,64                                        | Hs01096865_m1    |
| DUOX2    | dual oxidase 2                                                                                       | 50506       | 2,46                                                                  | 3,99                                            | -0,66                                        | Hs00204187_m1    |
| CCND1    | cyclin D1 (PRAD1: parathyroid adenomatosis 1)                                                        | 595         | 0,96                                                                  | 2,55                                            | -0,86                                        | Hs00277039_m1    |
| DIO1     | deiodinase, iodothyronine, type I                                                                    | 1733        | 2,71                                                                  | 5,1                                             | -0,89                                        | Hs00174944_m1    |
| DIO2     | deiodinase, iodothyronine, type II                                                                   | 1734        | 2,03                                                                  | 3,85                                            | -0,89                                        | Hs00255341_m1    |
| CLDN5    | claudin 5 (transmembrane protein deleted in velocardiofacial syndrome)                               | 7122        | -2,44                                                                 | 0,06                                            | -0,92                                        | Hs01561351_m1    |
| FGF12    | fibroblast growth factor 12                                                                          | 2257        | 2,19                                                                  | 3,37                                            | -1,03                                        | Hs00374427_m1    |
| CDH16    | cadherin 16, KSP-cadherin                                                                            | 1014        | -1,81                                                                 | 0,81                                            | -1,43                                        | Hs00187880_m1    |
| CDH2     | cadherin 2, type 1, N-cadherin (neuronal)                                                            | 1000        | -0,86                                                                 | -0,16                                           | -2,0                                         | Hs00169953_m1    |
| FOSB     | FBJ murine osteosarcoma viral oncogene homolog B                                                     | 2354        | 5,48                                                                  | 5,61                                            | -2,73                                        | Hs00171851_m1    |
| PAX2     | paired box gene 2                                                                                    | 5076        | -0,92                                                                 | 1,78                                            | -3,47                                        | Hs01057416_m1    |
| MYL2     | myosin, light polypeptide 2, regulatory, cardiac, slow                                               | 4633        | -2,78                                                                 | 0,26                                            | -4,32                                        | Hs00166405_m1    |
