# Supplementary material for: Transcriptome, Methylome and Genomic Variations Analysis of Ectopic Thyroid Glands
Source: PubMed Central journal article supplement (PMC2955549; doi:10.1371/journal.pone.0013420), 2010-10-15
Supplement: pone.0013420.s006.pdf [file pone.0013420.s006.pdf]

| chromosome      | start     | end       | length (bps) | classification | genes (Entrez Gene ID)                                                 | Validation with qPCR:<br>case (number of copies) | Assay ID      |               |               |
|-----------------|-----------|-----------|--------------|----------------|------------------------------------------------------------------------|--------------------------------------------------|---------------|---------------|---------------|
| <b>1p36.32</b>  | 3419310   | 3504625   | 85316        | common CNV     | MEGF6 (1953)                                                           | case 1 (3)                                       | Hs02299905_cn | Hs03346798_cn | Hs03344891_cn |
| <b>4p16.3</b>   | 1696020   | 1781125   | 85106        | common CNV     | FGFR3 (2261); TACC3 (10460)                                            | case 1 (4); case 3 (3)                           | Hs00091802_cn | Hs03518017_cn |               |
| <b>7q11.23</b>  | 74616550  | 74711750  | 95201        | common CNV     | LOC750805 similar to PMS2L14 (750805); WBSCR16 (81554); GATSL2(729438) | ∅                                                | *             | *             | *             |
| <b>12q24.33</b> | 131582000 | 131678000 | 96001        | common CNV     | AUTS2L (304419); FBRSL1(57666)                                         | case 1 (3); case 3 (3)                           | Hs03817872_cn | Hs03816047_cn | Hs03835002_cn |

\*Custom made qPCR for 7q11.23 are described in the table below.

| Assay ID      | Forward Primer Seq.    | Reverse Primer Seq.       | Probe                     |
|---------------|------------------------|---------------------------|---------------------------|
| chr7_CCWRDIS  | ATGTCCCCCTACTCAGTTCTCA | CTCCGAGGTCCCCAAAGATTG     | CTCCGAGGTCCCCAAAGATTG     |
| ch7-2_CCY89U8 | GGCCCGGACCCTTCCTA      | GTACCAGCTCATGGCAGTCT      | GTACCAGCTCATGGCAGTCT      |
| ch7-3_CC7ZW2S | GCACCAGCCTGGAAGGA      | CAAACCTCCCTCATTCCAGACAGAA | CAAACCTCCCTCATTCCAGACAGAA |
